# Supplementary material
Source: PubMed Central journal article supplement (PMC2533060)
Supplement: 97320630002405S1.pdf [file 97320630002405S1.pdf]

### Supplementary material

| Probe set name | Probe X | Probe Y | Probe interrogation position | Probe sequence target       | Strandedness |
|----------------|---------|---------|------------------------------|-----------------------------|--------------|
| 1007_s_at      | 467     | 181     | 3330                         | CACCCAGCTGGTCCTGTGGATGGGA   | Antisense    |
| 1007_s_at      | 531     | 299     | 3443                         | GCCCCACTGGACAACACTGATTCCT   | Antisense    |
| 1007_s_at      | 86      | 557     | 3512                         | TGGACCCCACTGGCTGAGAATCTGG   | Antisense    |
| 1007_s_at      | 365     | 115     | 3563                         | AAATGTTTCCTTGTGCCTGCTCCTG   | Antisense    |
| 1007_s_at      | 207     | 605     | 3570                         | TCCTTGTGCCTGCTCCTGACTTGT    | Antisense    |
| 1007_s_at      | 593     | 599     | 3576                         | TGCCTGCTCCTGTACTIONTGTCTCAG | Antisense    |
| 1007_s_at      | 425     | 607     | 3583                         | TCCTGTACTIONTGTCTCAGCTTGGGC | Antisense    |
| 1007_s_at      | 552     | 101     | 3589                         | ACTTGTCTCAGCTTGGGCTTCTTC    | Antisense    |
| 1007_s_at      | 680     | 607     | 3615                         | TCCTCCATCACCTGAAACACTGGAC   | Antisense    |
| 1007_s_at      | 532     | 139     | 3713                         | AAGCCTATACGTTTCTGTGGAGTAA   | Antisense    |
| 1007_s_at      | 143     | 709     | 3786                         | TTGGACATCTCTAGTGTAGCTGCCA   | Antisense    |
| 1007_s_at      | 285     | 623     | 3793                         | TCTCTAGTGTAGCTGCCACATTGAT   | Antisense    |
| 1007_s_at      | 383     | 479     | 3799                         | GTGTAGCTGCCACATTGATTTTCT    | Antisense    |

**Table 1:** Sample source data from the HG-U133A microarray in tab-delimited format.

| # observations<br>MM > PM | Probes without SNP |              | Probes with SNP   |              |
|---------------------------|--------------------|--------------|-------------------|--------------|
|                           | No. of occurrence  | % Occurrence | No. of occurrence | % Occurrence |
| 0                         | 873                | 52.3%        | 88                | 53.0%        |
| 1                         | 123                | 7.4%         | 14                | 8.4%         |
| 2                         | 92                 | 5.5%         | 8                 | 4.8%         |
| 3                         | 64                 | 3.8%         | 7                 | 4.2%         |
| 4                         | 54                 | 3.2%         | 2                 | 1.2%         |
| 5                         | 60                 | 3.6%         | 5                 | 3.0%         |
| 6                         | 46                 | 2.8%         | 5                 | 3.0%         |
| 7                         | 34                 | 2.0%         | 4                 | 2.4%         |
| 8                         | 48                 | 2.9%         | 3                 | 1.8%         |
| 9                         | 39                 | 2.3%         | 4                 | 2.4%         |
| 10                        | 37                 | 2.2%         | 6                 | 3.6%         |
| 11                        | 54                 | 3.2%         | 3                 | 1.8%         |
| 12                        | 146                | 8.7%         | 17                | 10.2%        |

**Table 2:** Mismatch to match expression level results.

| Probe ID    | dbSNP reference | Major allele | Frequency | Minor allele | Frequency |
|-------------|-----------------|--------------|-----------|--------------|-----------|
| 202192_s_at | Rs9545          | G            | 0.932     | C            | 0.068     |
| 207611_at   | Rs200485        | G            | 0.911     | C            | 0.089     |
| 203680_at   | Rs257378        | C            | 0.9       | G            | 0.1       |
| 201678_x_at | Rs10712         | G            | 0.875     | C            | 0.125     |
| 206529_x_at | Rs272679        | C            | 0.872     | G            | 0.128     |
| 210732_s_at | Rs2273865       | T            | 0.852     | A            | 0.148     |
| 219502_at   | Rs1055677       | C            | 0.849     | G            | 0.151     |
| 215261_at   | Rs12198616      | G            | 0.844     | C            | 0.156     |
| 206226_at   | Rs1042464       | T            | 0.756     | A            | 0.244     |
| 216811_at   | Rs11009339      | C            | 0.714     | G            | 0.286     |
| 215986_at   | Rs219307        | G            | 0.689     | C            | 0.311     |
| 221344_at   | Rs1011985       | G            | 0.659     | C            | 0.341     |
| 214836_x_at | Rs232230        | G            | 0.655     | C            | 0.345     |
| 209313_at   | Rs8731          | G            | 0.633     | C            | 0.367     |
| 210618_at   | Rs4654973       | C            | 0.622     | G            | 0.378     |
| 217530_at   | Rs7447593       | C            | 0.622     | G            | 0.378     |
| 219093_at   | Rs3755302       | T            | 0.589     | A            | 0.411     |

|           |            |   |       |   |       |
|-----------|------------|---|-------|---|-------|
| 216463_at | Rs16849300 | G | 0.578 | C | 0.422 |
| 207075_at | Rs10754558 | G | 0.5   | C | 0.5   |
| 219424_at | Rs6613     | A | 0.5   | T | 0.5   |

**Table 3:** Complementary SNP probes with Minor Allele Frequency > 5%.

| # MM > PM | Expected % of SNPs* | Observed<br>SNP probes (%) | Observed<br>nonSNP probes (%) |
|-----------|---------------------|----------------------------|-------------------------------|
| 0         | 5%                  | 6 (30%)                    | 77 (38.3%)                    |
| 1         | 35%                 | 0 (0%)                     | 23 (11.4%)                    |
| 2         | 10%                 | 0 (0%)                     | 10 (5.0%)                     |
| 3         | 30%                 | 1 (5%)                     | 12 (6.0%)                     |
| 4         | 5%                  | 1 (5%)                     | 9 (4.5%)                      |
| 5         | 10%                 | 2 (10%)                    | 10 (5%)                       |
| 6         | 0%                  | 1 (5%)                     | 5 (2.5%)                      |
| 7         | 0%                  | 1 (5%)                     | 8 (4.0%)                      |
| 8         | 0%                  | 0 (0%)                     | 11 (5.5%)                     |
| 9         | 0%                  | 0 (0%)                     | 3 (1.5%)                      |
| 10        | 0%                  | 5 (25%)                    | 6 (3%)                        |
| 11        | 0%                  | 1 (5%)                     | 9 (4.5%)                      |
| 12        | 0%                  | 2 (10%)                    | 18 (9%)                       |

**Table 4:** Probes with MM > PM for SNPs with Minor Allele Frequency > 5%.
